# Supplementary material for: HOMO–LUMO energy gap control in platinum(ii) biphenyl complexes containing 2,2′-bipyridine ligands
Source: Royal Society of Chemistry journal article supplement (doi:10.1039/c5dt01891a), 2015-01-01
Supplement: c5dt01891a1.pdf [file c5dt01891a1.pdf]

# Supporting Information

for

## HOMO-LUMO Energy Gap Control in Platinum(II) Biphenyl Complexes Containing 2,2'-Bipyridine Ligand

**D. Paul Rillema<sup>1\*</sup>, Stanislav R. Stoyanov,<sup>3,4,5,\*</sup> Arvin J. Cruz<sup>2</sup>, Huy Nguyen<sup>1</sup>, C. Moore<sup>1</sup>,  
Khamis Siam<sup>6</sup> and Venugopal KomReddy<sup>1</sup>**

<sup>1</sup>Department of Chemistry, Wichita State University, Wichita, KS 67260, USA

<sup>2</sup>Department of Chemistry, Fort Hays State University, Hays, KS 67601, USA

<sup>3</sup>National Institute for Nanotechnology, 11421 Saskatchewan Drive NW, Edmonton, Alberta,  
T6G 2M9, Canada

<sup>4</sup>Department of Chemical and Materials Engineering, University of Alberta, Edmonton, Alberta,  
T6G 2V4, Canada

<sup>5</sup>Department of Mechanical Engineering, University of Alberta, Edmonton Alberta, T6G 2G3,  
Canada

<sup>6</sup>Department of Chemistry, Pittsburg State University, Pittsburg, KS 66762, USA

\* Corresponding author. E-mail: [paul.rillema@wichita.edu](mailto:paul.rillema@wichita.edu); [stoyanov@ualberta.ca](mailto:stoyanov@ualberta.ca)

## 1. Method Exploration.

**Table S1.** Platinum-ligand Bond Lengths (Å) and Ligand Bite Angles (°) optimized for Isolated Complexes in Singlet Ground State (SGS) in Acetonitrile Solvent Using the B3LYP/TZVP-QZV-P/CPCM and PBE0PBE/TZVP-QZV-P/CPCM Methods.

| Optimized | Pt(bph)(4,4'-(NH <sub>2</sub> ) <sub>2</sub> bpy) | Pt(bph)(4,4'-Me <sub>2</sub> bpy) | Pt(bph)(bpy) | Pt(bph)(4,4'-Ph <sub>2</sub> bpy) | Pt(bph)(4,4'-Br <sub>2</sub> bpy) | Pt(bph)(4,4'-(COOC <sub>2</sub> H <sub>5</sub> ) <sub>2</sub> bpy) |
|-----------|---------------------------------------------------|-----------------------------------|--------------|-----------------------------------|-----------------------------------|--------------------------------------------------------------------|
|           |                                                   |                                   | B3LYP        |                                   |                                   |                                                                    |
| Pt-C      | 2.021                                             | 2.022                             | 2.022        | 2.021                             | 2.020                             | 2.021                                                              |
| Pt-N      | 2.185                                             | 2.184                             | 2.182        | 2.180                             | 2.185                             | 2.175                                                              |
| C-Pt-C    | 80.4                                              | 80.4                              | 80.3         | 80.4                              | 80.4                              | 80.4                                                               |
| N-Pt-N    | 75.3                                              | 75.4                              | 75.5         | 75.6                              | 75.4                              | 75.8                                                               |
|           |                                                   |                                   | PBE0PBE      |                                   |                                   |                                                                    |
| Pt-C      | 2.001                                             | 2.002                             | 2.003        | 2.001                             | 2.001                             | 2.001                                                              |
| Pt-N      | 2.142                                             | 2.140                             | 2.138        | 2.137                             | 2.143                             | 2.134                                                              |
| C-Pt-C    | 80.6                                              | 80.6                              | 80.5         | 80.6                              | 80.6                              | 80.6                                                               |
| N-Pt-N    | 76.1                                              | 76.3                              | 76.4         | 76.4                              | 76.2                              | 76.4                                                               |

**Figure S1.** Calculated <sup>1</sup>MLLCT State Energies vs  $\sigma_p$  for the Pt(bph)(4,4'-X<sub>2</sub>bpy) Complexes Using the B3BPE/TZVP-QZV-P/CPCM, B3LYP/TZVP-QZV-P/CPCM and PBE0/TZVP-QZV-P/CPCM Methods. The linear fitting analysis results are listed in Table S2.

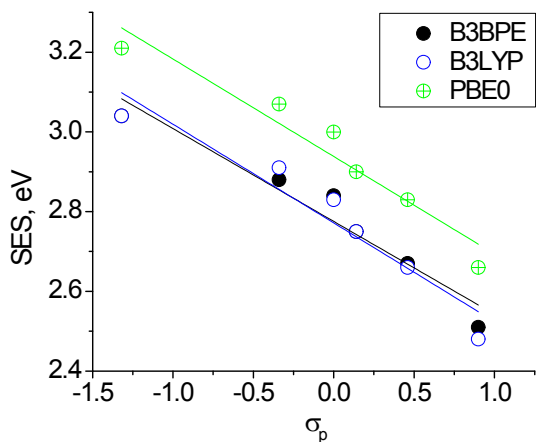

**Table S2.** Linear fitting analysis results for the correlations shown in Figure S1.

| Correlation | Slope | Intercept | R <sup>2</sup> |
|-------------|-------|-----------|----------------|
| B3BPE       | -0.23 | 2.78      | 0.93           |
| B3LYP       | -0.25 | 2.77      | 0.90           |
| PBE0        | -0.24 | 2.94      | 0.92           |

## 2. Results.

**Figure S2.** Electron Spin Density Distribution Around Pt(bph)(4,4'-(NH<sub>2</sub>)<sub>2</sub>bpy) Optimized in the T<sub>1</sub> State Constrained to C<sub>2</sub> Symmetry Plotted at Isovalue of 0.003 e/Å<sup>3</sup> for the LLTS of Isolated Molecules in Acetonitrile Solvent Computed Using the B3PBE/TZVP-QZV-P/CPCM Method. The α and β spin densities are shown as tan and green meshes, respectively.

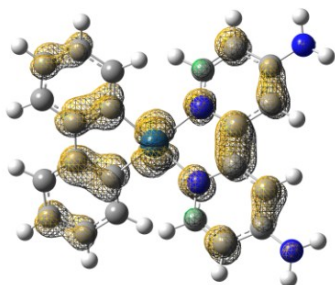

**Figure S3.** Spatial distributions of the 10 highest occupied (labeled H-9 to H) and 10 lowest unoccupied molecular orbitals (labeled L to L+9) of the complexes in the singlet ground state plotted at isosurface of 0.03 e/Å<sup>3</sup> calculated using the B3PBE/TZVP-QZV-P/CPCM method. Red and green isosurface colors denote + and – nodes, respectively.

|     | Pt(bph)(4,4'-(NH <sub>2</sub> ) <sub>2</sub> bpy) | Pt(bph)(4,4'-Me <sub>2</sub> bpy) | Pt(bph)(bpy) | Pt(bph)(4,4'-Ph <sub>2</sub> (bpy) | Pt(bph)(4,4'-Br <sub>2</sub> bpy) | Pt(bph)(4,4'-(COOC <sub>2</sub> H <sub>5</sub> ) <sub>2</sub> (bpy) |
|-----|---------------------------------------------------|-----------------------------------|--------------|------------------------------------|-----------------------------------|---------------------------------------------------------------------|
| L+9 |                                                   |                                   |              |                                    |                                   |                                                                     |
| L+8 |                                                   |                                   |              |                                    |                                   |                                                                     |

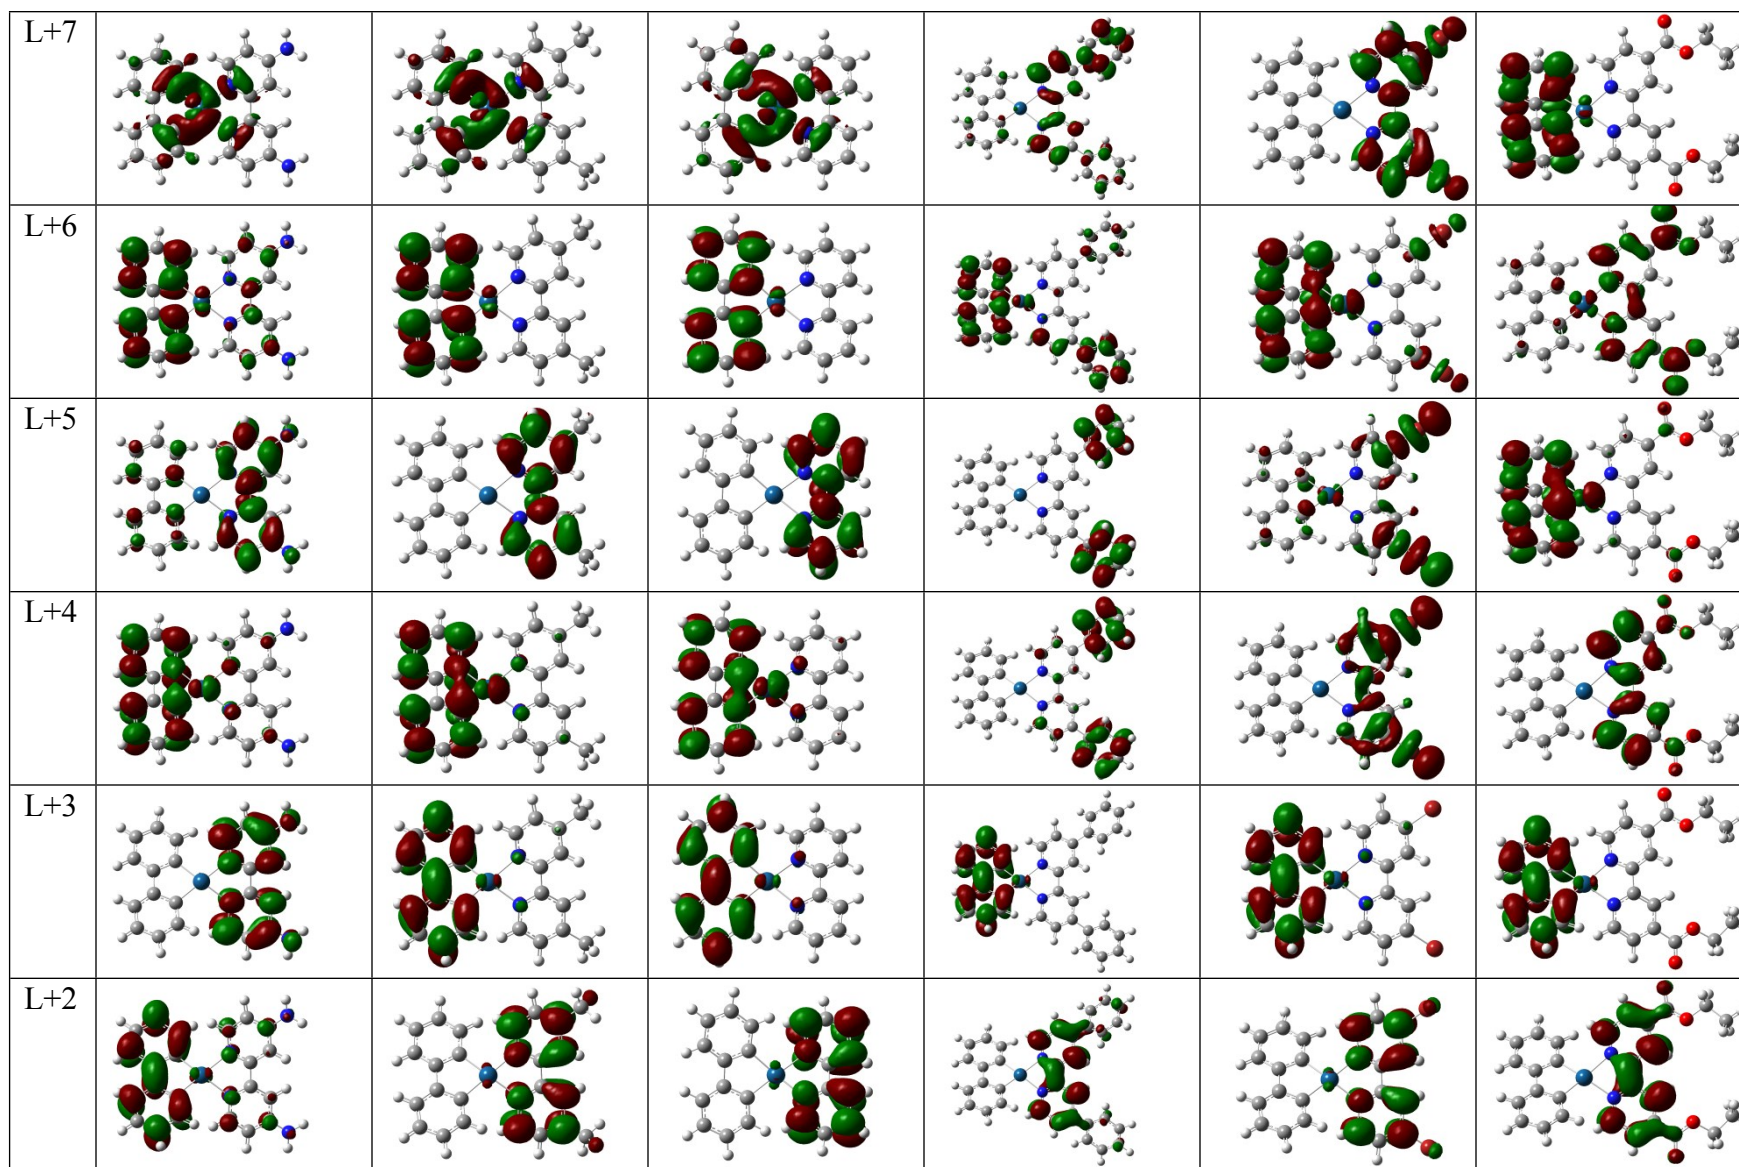



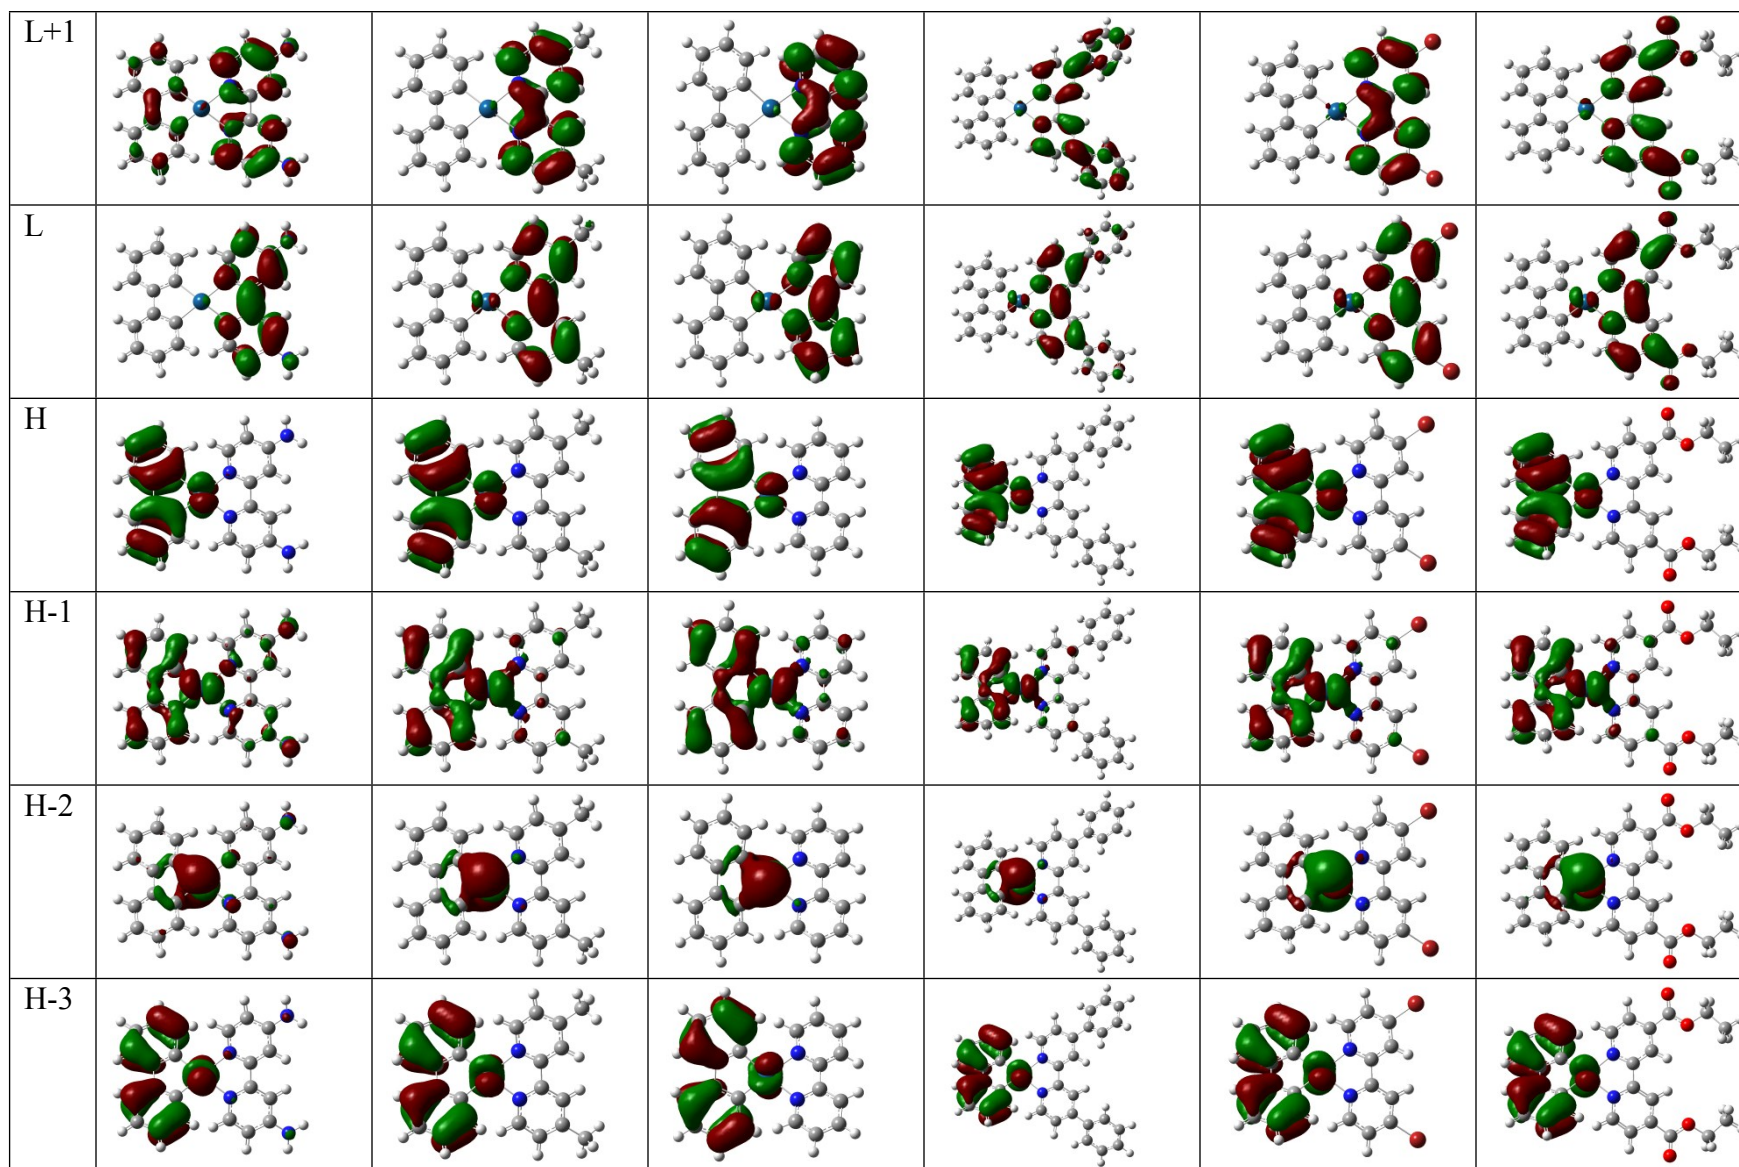

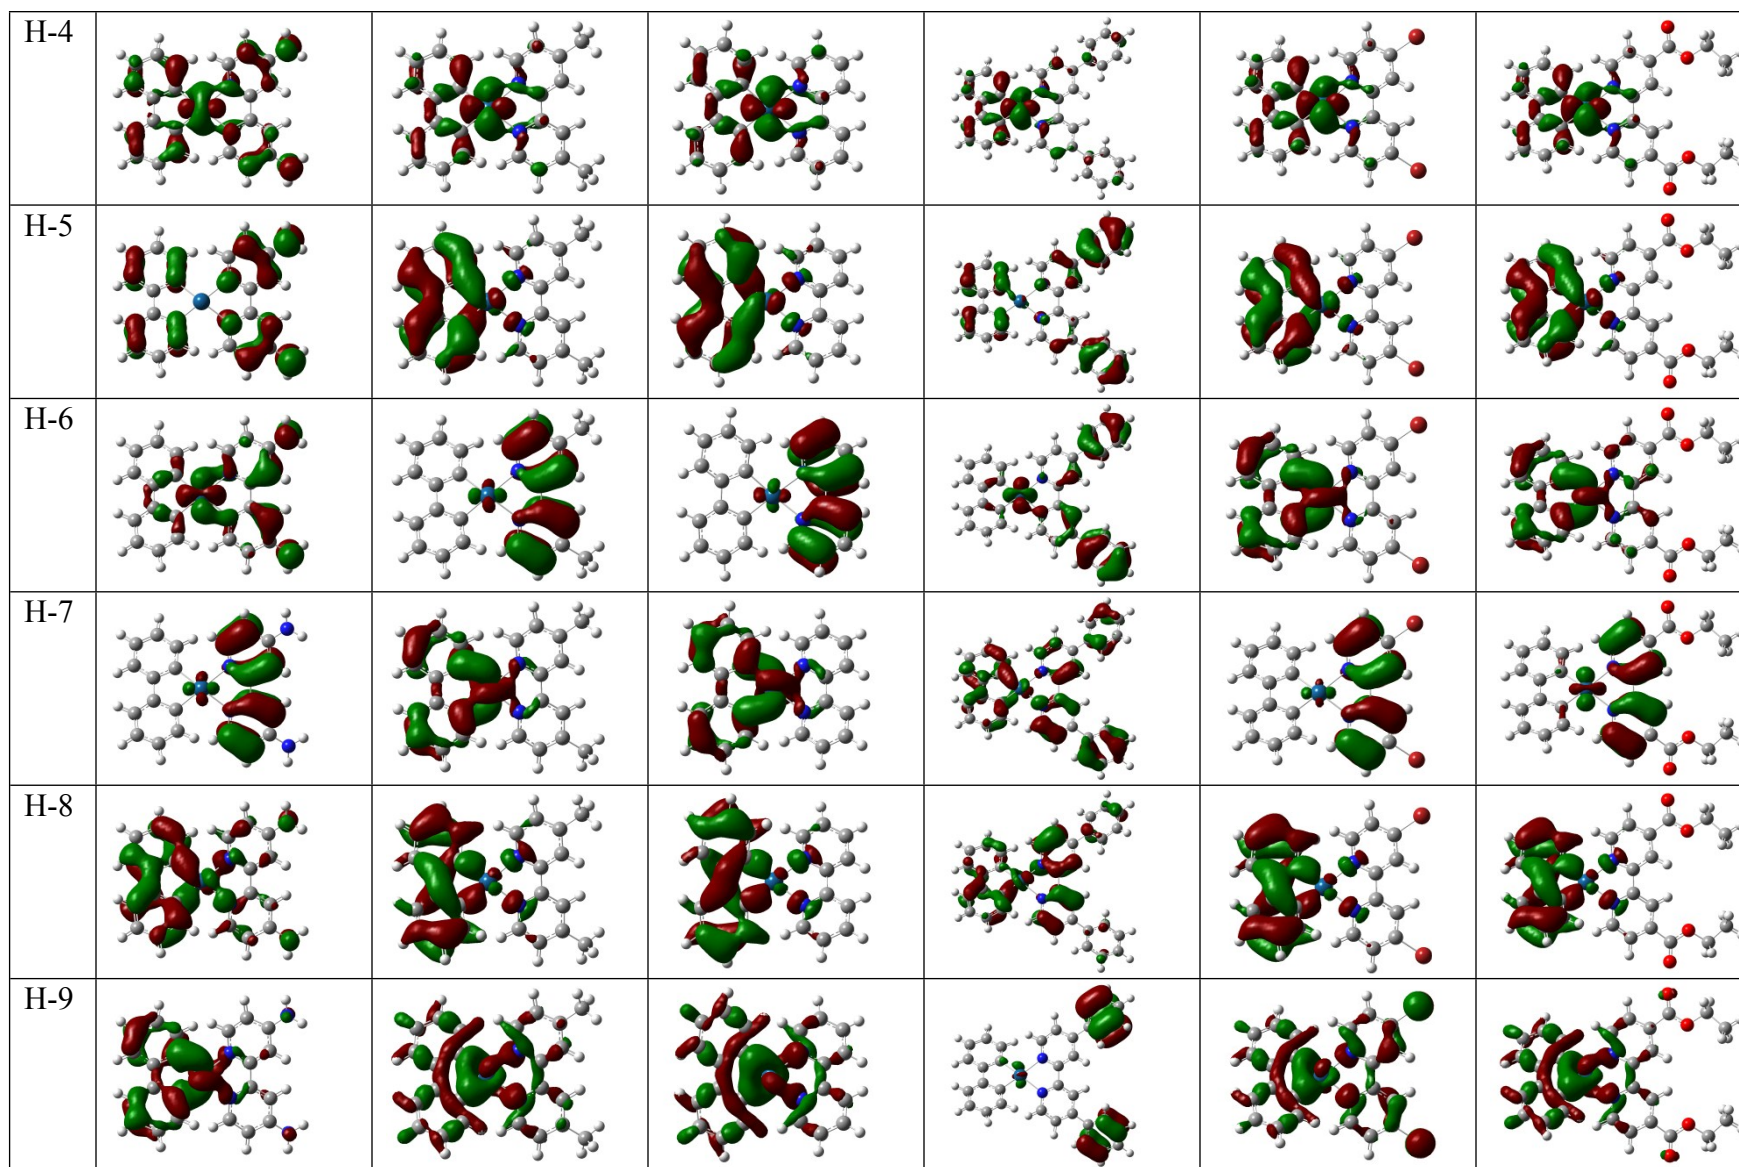

**Figure S4.** Emission spectrum of Pt(bph)(4,4'-(NH<sub>2</sub>)<sub>2</sub>bpy) in a butyronitrile glass at 77K with excitation at the low energy absorption maximum. The emission spectrum differs from the others due to the difference of the emitting excited state resulting in a different profile.

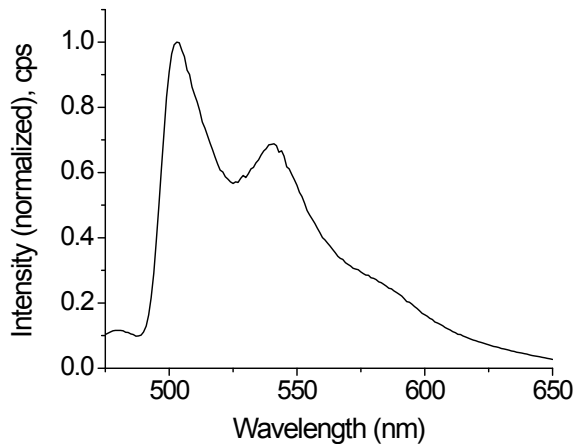

### 3. Discussion.

**Figure S5.** Electron Affinity (EA) vs  $\sigma_p$  for Pt(bph)(4,4'-X<sub>2</sub>bpy) Calculated Using the B3PBE/TZVP-QZV-P/CPCM Method. The linear fitting analysis results are  $R^2= 0.99$ , slope= -0.43, intercept= -2.77.

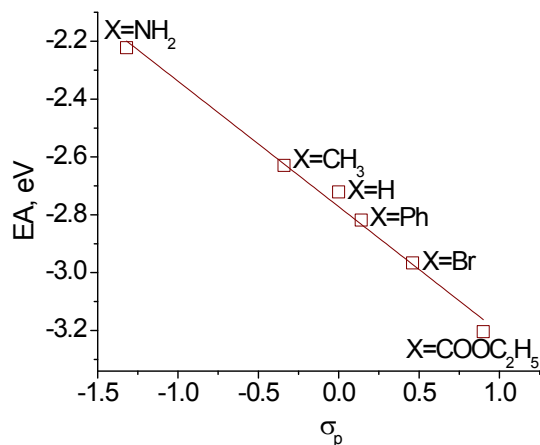

**Figure S6.** The HOMO-LUMO Gap Calculated as the Lowest-lying SES vs  $\sigma_p$  for Pt(bph)(4,4'-X<sub>2</sub>bpy) Using the B3PBE/TZVP-QZV-P/CPCM Method. The linear fitting analysis results are  $R^2= 0.98$ , slope= -0.34, intercept= 2.22.

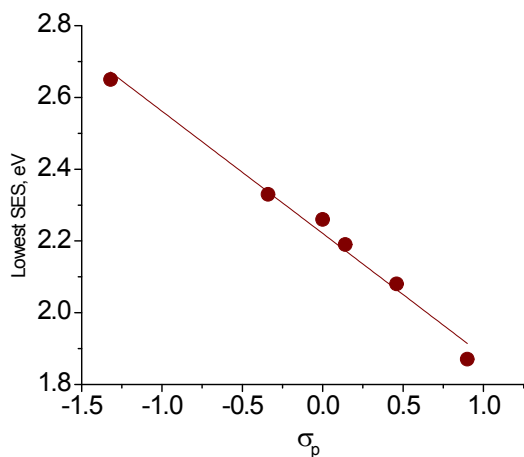



**Figure S7.** Geometries of the Complexes in the SGS Optimized Using the B3PBE/TZVP-QZV-P/CPCM Method Highlighting the bph-bpy Torsion Angle Characteristic of the X-configuration.

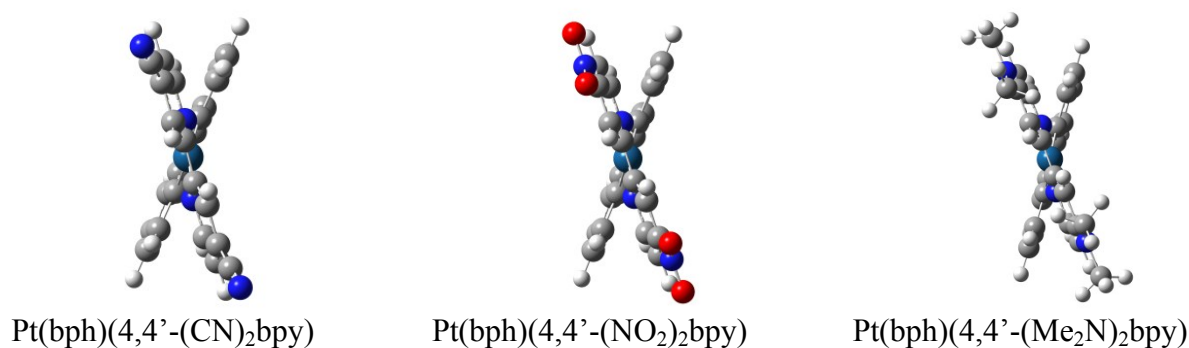

**Figure S8.** Electron Spin Density Distributions Around the Complexes in the LLTS Plotted at an Isovalue of 0.003  $e/\text{Å}^3$  of Isolated Molecules in Acetonitrile Solvent Computed Using the B3PBE/TZVP-QZV-P/CPCM Method. The  $\alpha$  and  $\beta$  spin densities are shown as tan and green meshes, respectively.

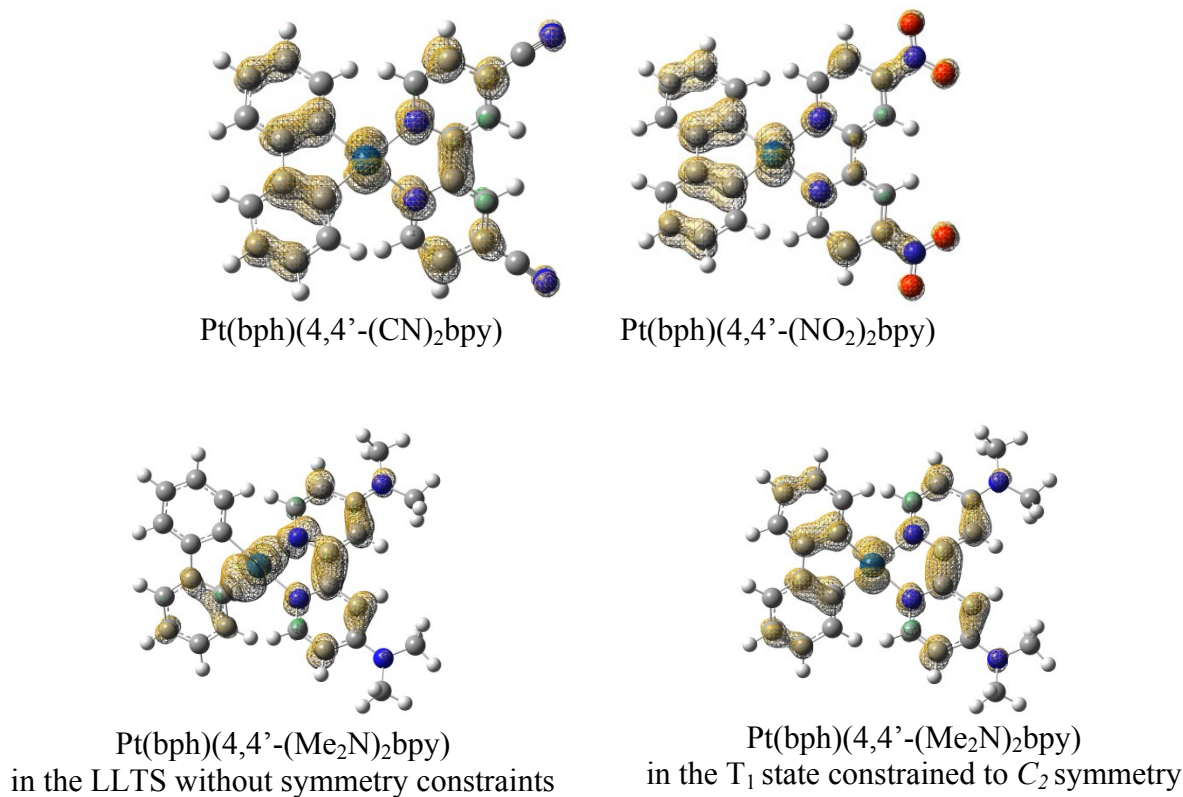

**Table S3.** Linear fitting analysis results for the correlations shown in Figures 7 and 8.

| Correlation                                                    | Figure | Slope | Intercept | R <sup>2</sup> |
|----------------------------------------------------------------|--------|-------|-----------|----------------|
| Experimental E <sub>Abs</sub> (MLLCT) vs $\sigma_p$            | 7(a)   | -0.27 | 2.77      | 0.90           |
| Calculated <sup>1</sup> MLLCT SES vs $\sigma_p$                | 7(a)   | -0.23 | 2.78      | 0.93           |
| Experimental E <sub>Em</sub> vs $\sigma_p$                     | 7(b)   | -0.27 | 2.12      | 1.00           |
| Calculated <sup>3</sup> LLTS vs $\sigma_p$                     | 7(b)   | -0.24 | 1.88      | 0.88           |
| Emission lifetime vs $\sigma_p$                                | 7(c)   | -0.91 | 0.86      | 0.87           |
| Experimental E <sub>1/2red</sub> vs $\sigma_p$                 | 7(d)   | 0.40  | -1.38     | 0.99           |
| Calculated E <sub>LUMO</sub> vs $\sigma_p$                     | 7(d)   | -0.44 | -2.61     | 0.98           |
| Calculated E <sub>HOMO</sub> - E <sub>LUMO</sub> vs $\sigma_p$ | 8      | -0.34 | 2.85      | 0.97           |

**Table S4.** Platinum-ligand Bond Lengths (Å), Ligand Bite Angles (°) and bph-bpy Torsion Angle (°) Optimized for Isolated Complexes in Singlet Ground State (SGS) and Lowest-lying Triplet State (LLTS) in Acetonitrile Solvent Using the B3PBE/TZVP-QZV-P/CPCM Method. The Mulliken atomic charges ( $|e|$ ) of the Pt atoms q (Pt) are also listed.

| Optimized | Pt(bph)(4,4'-(NO <sub>2</sub> ) <sub>2</sub> (bpy) |       | Pt(bph)(4,4'-(CN) <sub>2</sub> bpy) |       | Pt(bph)(4,4'-(Me <sub>2</sub> N) <sub>2</sub> bpy) |              |
|-----------|----------------------------------------------------|-------|-------------------------------------|-------|----------------------------------------------------|--------------|
|           | SGS                                                | LLTS  | SGS                                 | LLTS  | SGS                                                | LLTS         |
| Pt-C      | 2.005                                              | 1.971 | 2.006                               | 1.972 | 2.004                                              | 2.019, 2.000 |
| Pt-N      | 2.137                                              | 2.139 | 2.141                               | 2.119 | 2.144                                              | 2.106, 2.053 |
| C-Pt-C    | 80.5                                               | 80.2  | 80.5                                | 81.3  | 80.5                                               | 80.8         |
| N-Pt-N    | 76.4                                               | 77.0  | 76.4                                | 77.5  | 76.0                                               | 78.1         |
| bph-bpy   | 42.0                                               | 35.8  | 40.5                                | 33.3  | 36.4                                               | 41.9         |
| q (Pt)    | 0.68                                               | 0.87  | 0.66                                | 0.88  | 0.56                                               | 1.06         |
| q (bpy)   | 0.27                                               | -0.46 | 0.29                                | -0.39 | 0.47                                               | -0.10        |
| q (bph)   | -0.94                                              | -0.41 | -0.96                               | -0.49 | -1.03                                              | -0.96        |

**Table S5.** Lowest-lying Triplet States (LLTS) (in eV and in parentheses in nm) of Isolated Molecules Fully Optimized in Acetonitrile Solvent Using the TD-DFT/B3PBE/TZVP-QZV-P/CPCM Method. The LLTS type is assigned based on the distribution of the 2 unpaired electrons, labeled as spin densities ( $\rho_s$ ) among the Pt atom and the bpy and bph ligand moieties. The spin density distributions are presented in Figure S6.

| Complex                                                              | LLTS                      | Type                                                                  | $\rho_s$ (Pt)       | $\rho_s$ (bpy)      | $\rho_s$ (bph)      |
|----------------------------------------------------------------------|---------------------------|-----------------------------------------------------------------------|---------------------|---------------------|---------------------|
| Pt(bph)(4,4'-(NO <sub>2</sub> ) <sub>2</sub> bpy)                    | 1.09 (1135)               | <sup>3</sup> LC <sub>bpy-bph</sub> / <sup>3</sup> MLCT                | 0.26                | 0.96                | 0.78                |
| Pt(bph)(4,4'-(CN) <sub>2</sub> bpy)                                  | 1.40 (887)                | <sup>3</sup> LC <sub>bpy-bph</sub> / <sup>3</sup> MLCT                | 0.29                | 0.95                | 0.76                |
| Pt(bph)(4,4'-(Me <sub>2</sub> N) <sub>2</sub> bpy)                   | 2.17 (571)                | <sup>3</sup> MLCT                                                     | 0.66                | 1.14                | 0.20                |
| T <sub>1</sub> of Pt(bph)(4,4'-(Me <sub>2</sub> N) <sub>2</sub> bpy) | 2.30 (540) <sup>[a]</sup> | <sup>3</sup> LC <sub>bpy-bph</sub> / <sup>3</sup> MLCT <sup>[a]</sup> | 0.38 <sup>[a]</sup> | 1.04 <sup>[a]</sup> | 0.58 <sup>[a]</sup> |

<sup>[a]</sup> Refer to the T<sub>1</sub> state of Pt(bph)(4,4'-(Me<sub>2</sub>N)<sub>2</sub>bpy).

**Table S6.** Singlet Excited States (SES) (in eV and in parentheses in nm) with Oscillator Strength (f) Higher Than 0.09 of Isolated Molecules in Acetonitrile Solvent Calculated as Vertical Electronic Transitions Using the TD-DFT/B3PBE/TZVP-QZV-P/CPCM Method. The transition types are assigned based on the major contributing electronic transitions with percentages listed in parentheses. The spatial distributions of the molecular orbitals participating in these transitions are shown in Supporting Information Figure S1. MLCT = metal-to-ligand charge transfer; LC = ligand-centered; MLLCT = metal-and-ligand-1-to-ligand-2 charge transfer (see subscripts for ligand 1 and ligand 2); deloc. = delocalized with distribution throughout the entire molecule. Subscripts denote the major contributing moiety.

| Complex                                            | SES        | f                                                    | Type                                                                 | Transition     |
|----------------------------------------------------|------------|------------------------------------------------------|----------------------------------------------------------------------|----------------|
| Pt(bph)(4,4'-(NO <sub>2</sub> ) <sub>2</sub> bpy)  | 2.13 (583) | 0.24                                                 | ML <sub>bph</sub> L <sub>bpy</sub> CT                                | H-1→L (93%)    |
|                                                    | 4.04 (307) | 0.10                                                 | L <sub>bph</sub> L <sub>bpy</sub> CT, $\pi \rightarrow \pi^*_{bph}$  | H-9→L (70%)    |
|                                                    | 4.43 (280) | 0.11                                                 | $\pi \rightarrow \pi^*_{bph}$ , ML <sub>bph</sub> CT                 | H-3→L+5 (54%)  |
|                                                    |            |                                                      | $\pi \rightarrow \pi^*_{bph}$ , ML <sub>bph</sub> CT                 | H-2→L+5 (19%)  |
|                                                    | 4.85 (255) | 0.10                                                 | $\pi \rightarrow \pi^*_{bph}$ , ML <sub>bph</sub> CT                 | H-3→L+5 (36%)  |
|                                                    |            |                                                      | $\pi \rightarrow \pi^*_{bpy}$                                        | H-8→L+2 (20%)  |
| 4.88 (254)                                         | 0.53       | $\pi \rightarrow \pi^*_{bpy}$                        | H-8→L+2 (54%)                                                        |                |
|                                                    |            | $\pi \rightarrow \pi^*_{bph}$ , ML <sub>bph</sub> CT | H-3→L+5 (16%)                                                        |                |
| Pt(bph)(4,4'-(CN) <sub>2</sub> bpy)                | 2.53 (491) | 0.21                                                 | ML <sub>bph</sub> L <sub>bpy</sub> CT                                | H-1→L (36%)    |
|                                                    |            |                                                      | ML <sub>bph</sub> L <sub>bpy</sub> CT                                | H→L+1 (64%)    |
|                                                    | 4.11 (302) | 0.13                                                 | ML <sub>bph</sub> L <sub>bpy</sub> CT                                | H-9→L (54%)    |
|                                                    |            |                                                      | $\pi \rightarrow \pi^*_{bpy}$                                        | H-8→L (28%)    |
|                                                    | 4.26 (291) | 0.15                                                 | $\pi$ ML <sub>bph</sub> L <sub>bpy</sub> CT                          | H-4→L+2 (78%)  |
|                                                    | 4.83 (257) | 0.39                                                 | $\pi \rightarrow \pi^*_{bph}$                                        | H-3→L+3 (62%)  |
| $\pi \rightarrow \pi^*_{bph}$                      |            |                                                      | H→L+8 (18%)                                                          |                |
| Pt(bph)(4,4'-(Me <sub>2</sub> N) <sub>2</sub> bpy) | 3.03 (409) | 0.24                                                 | Deloc.→ $\pi^*_{bpy}$                                                | H-1→L (100%)   |
|                                                    | 3.73 (332) | 0.10                                                 | ML <sub>bph</sub> L <sub>bpy</sub> CT, $\pi \rightarrow \pi^*_{bph}$ | H→L+2 (90%)    |
|                                                    | 3.79 (327) | 0.20                                                 | deloc.→ deloc.                                                       | H-1→L+1 (100%) |
|                                                    | 4.40 (282) | 0.14                                                 | ML <sub>bph</sub> →deloc.                                            | H-3→L+1 (75%)  |
|                                                    | 4.64 (267) | 0.18                                                 | deloc.→ deloc.                                                       | H-4→L+1 (49%)  |
|                                                    |            |                                                      | $\pi \rightarrow \pi^*_{bpy}$                                        | H-7→L (28%)    |
|                                                    | 4.66 (266) | 0.17                                                 | ML <sub>bph</sub> →deloc.                                            | H-3→L+2 (59%)  |
|                                                    |            |                                                      | $\pi \rightarrow \pi^*_{bpy}$                                        | H-7→L (11%)    |
|                                                    | 4.69 (264) | 0.10                                                 | ML <sub>bph</sub> L <sub>bpy</sub> CT                                | H-9→L (73%)    |
|                                                    | 4.71 (263) | 0.29                                                 | $\pi \rightarrow \pi^*_{bpy}$                                        | H-7→L (38%)    |
|                                                    |            |                                                      | deloc.→ deloc.                                                       | H-2→L+2 (23%)  |
|                                                    | 4.75 (261) | 0.10                                                 | deloc.→ deloc.                                                       | H-2→L+2 (49%)  |
| deloc.→ deloc.                                     |            |                                                      | H-4→L+1 (20%)                                                        |                |
| 4.83 (257)                                         | 0.11       | ML <sub>bph</sub> L <sub>bpy</sub> CT                | H-3→L+3 (87%)                                                        |                |
| 4.86 (255)                                         | 0.26       | deloc.→ deloc.                                       | H-6→L+1 (82%)                                                        |                |
